# Supplementary material for: Development of Benzobisoxazole-Based Novel Conjugated Polymers for Organic Thin-Film Transistors
Source: MDPI journal article supplement (doi:10.3390/polym15051156), 2023-02-24
Supplement: s1 [file s1]

Supporting Information

# Development of Benzobisoxazole-Based Novel Conjugated Polymers for Organic Thin-Film Transistors

WonJo Jeong <sup>1,†</sup>, Kyumin Lee <sup>2,†</sup>, Jaeyoung Jang <sup>2,\*</sup> and In Hwan Jung <sup>1,\*</sup>

<sup>1</sup> Human-Tech Convergence Program, Department of Organic and Nano Engineering, Hanyang University, 222 Wangsimni-ro, Seongdong-gu, Seoul 04763, Republic of Korea

<sup>2</sup> Department of Energy Engineering, Hanyang University, Seoul 04763, Republic of Korea

\* Correspondence: jyjang15@hanyang.ac.kr (J.J.); inhjung@hanyang.ac.kr (I.H.J.)

† These authors contributed equally to this work.

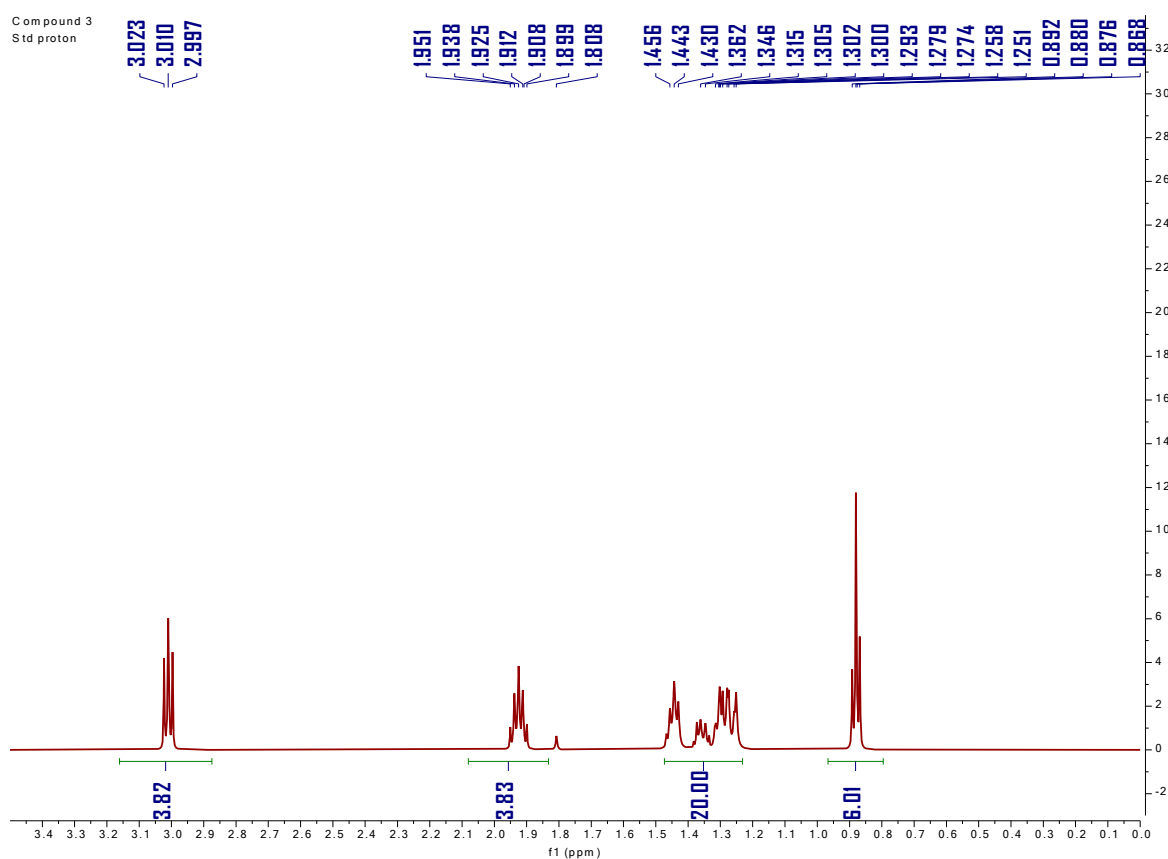

Figure S1. <sup>1</sup>H NMR of compound 3 (BBO).

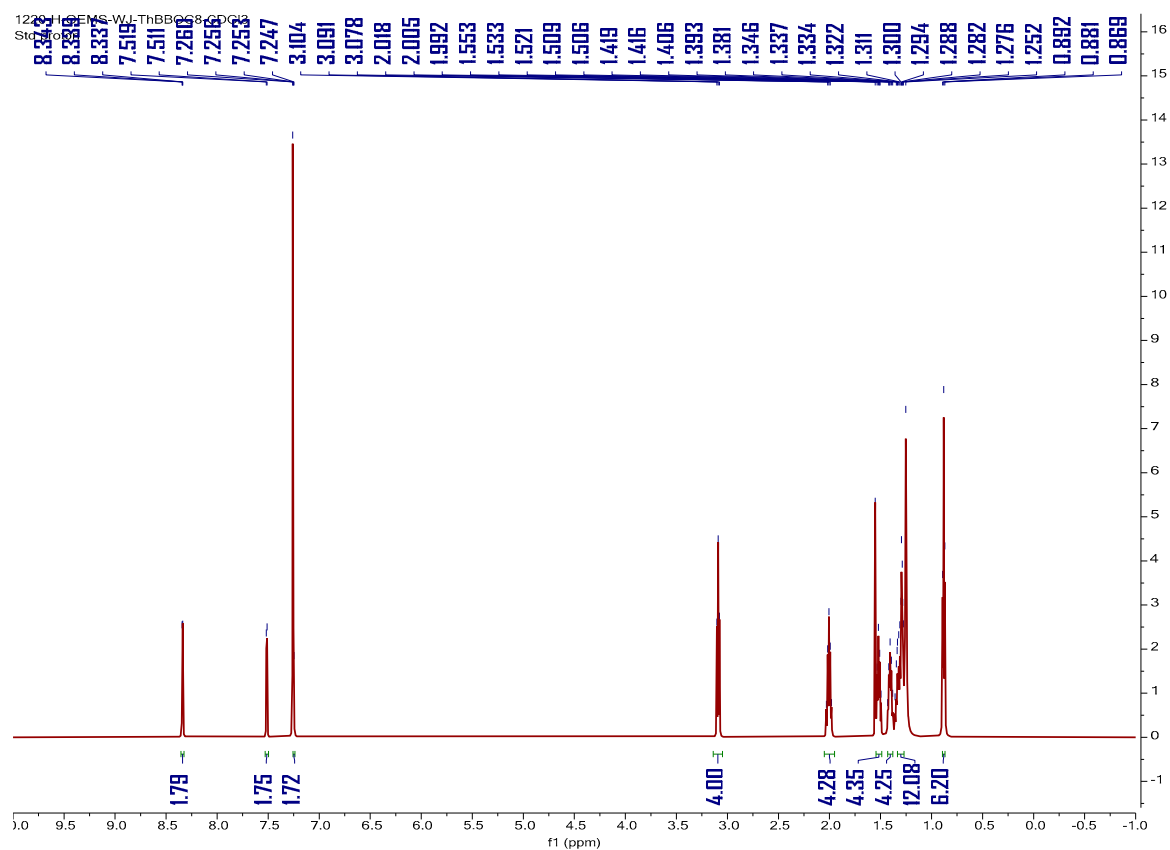Figure S2. <sup>1</sup>H NMR of compound 4.

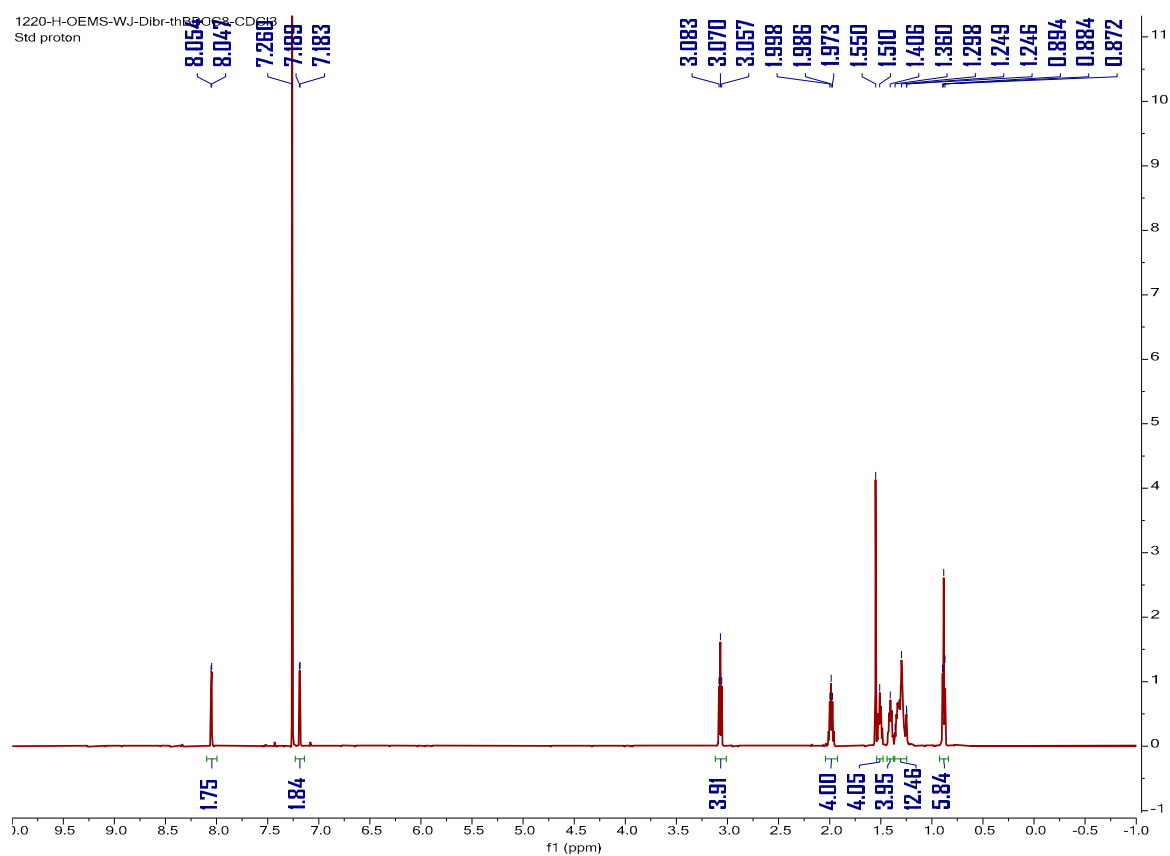Figure S3. <sup>1</sup>H NMR of compound 5.

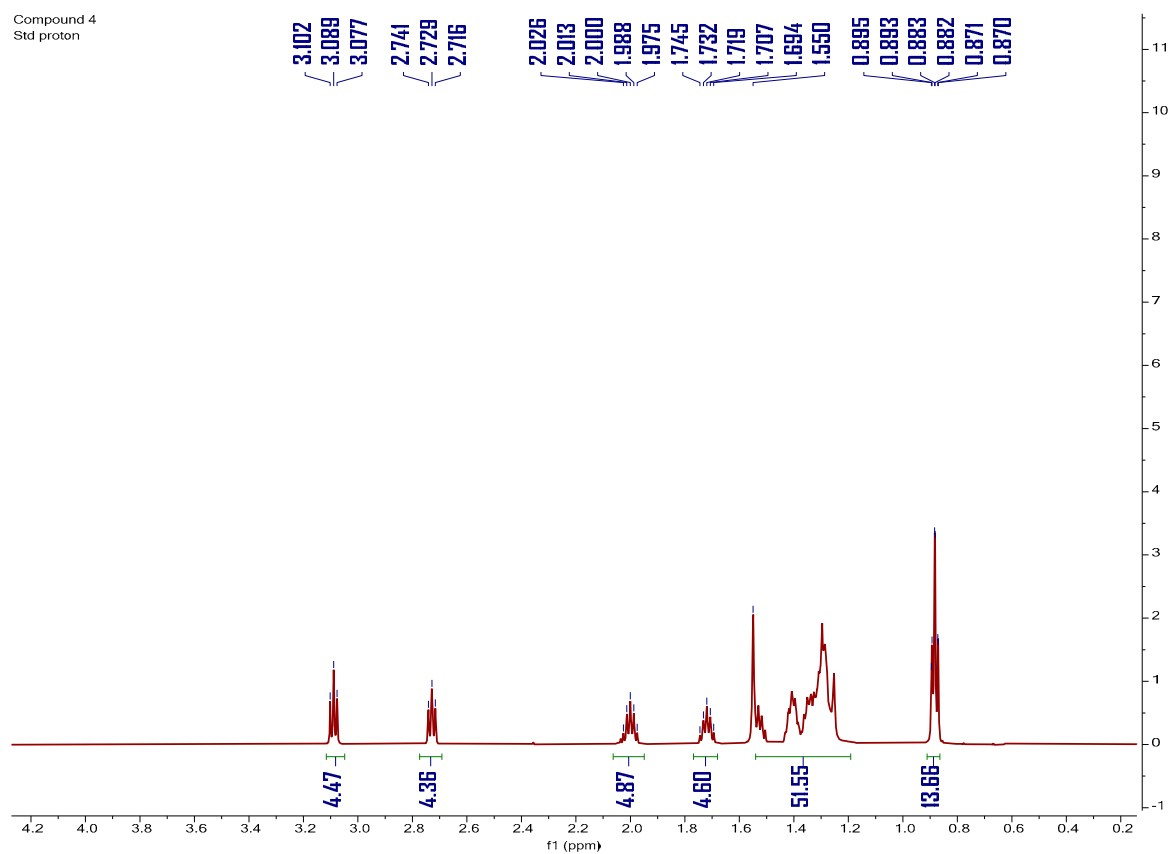

Figure S4.  $^1\text{H}$  NMR of compound 6.

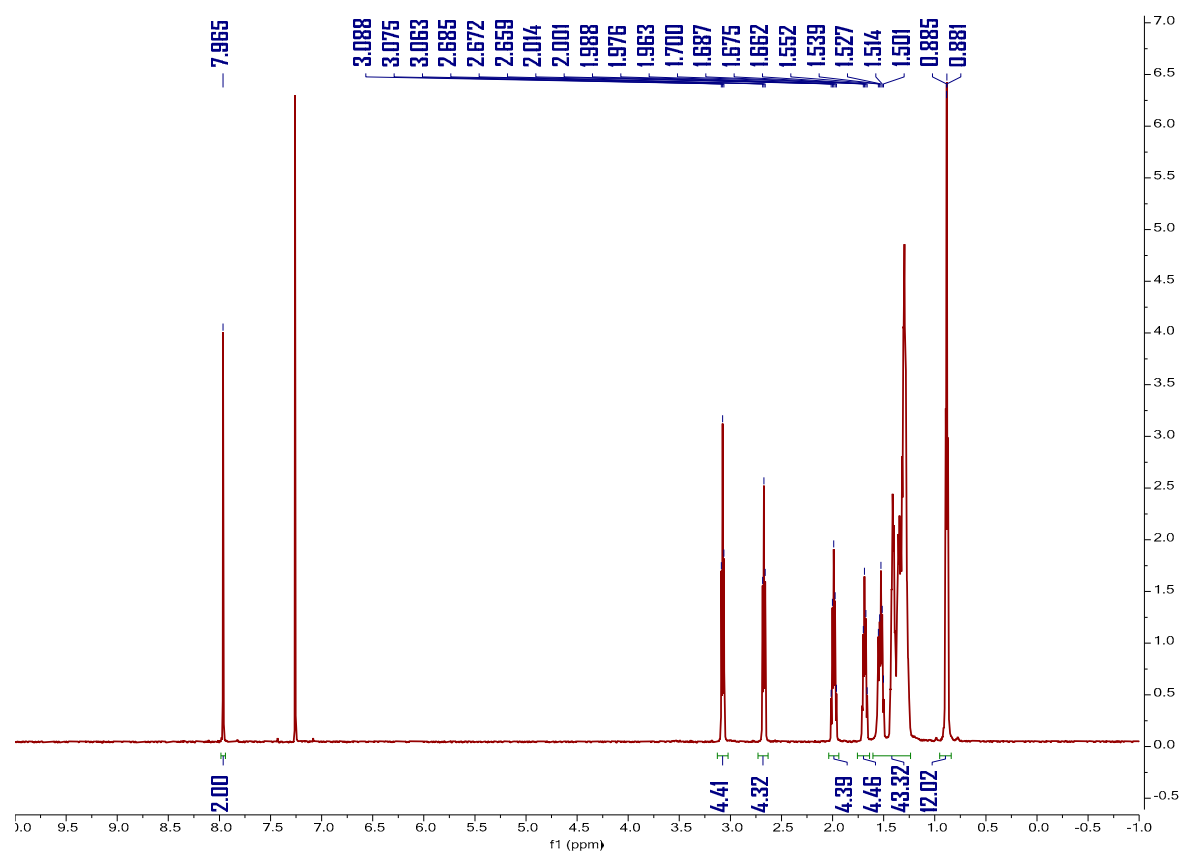Figure S5.  $^1\text{H}$  NMR of compound 7.

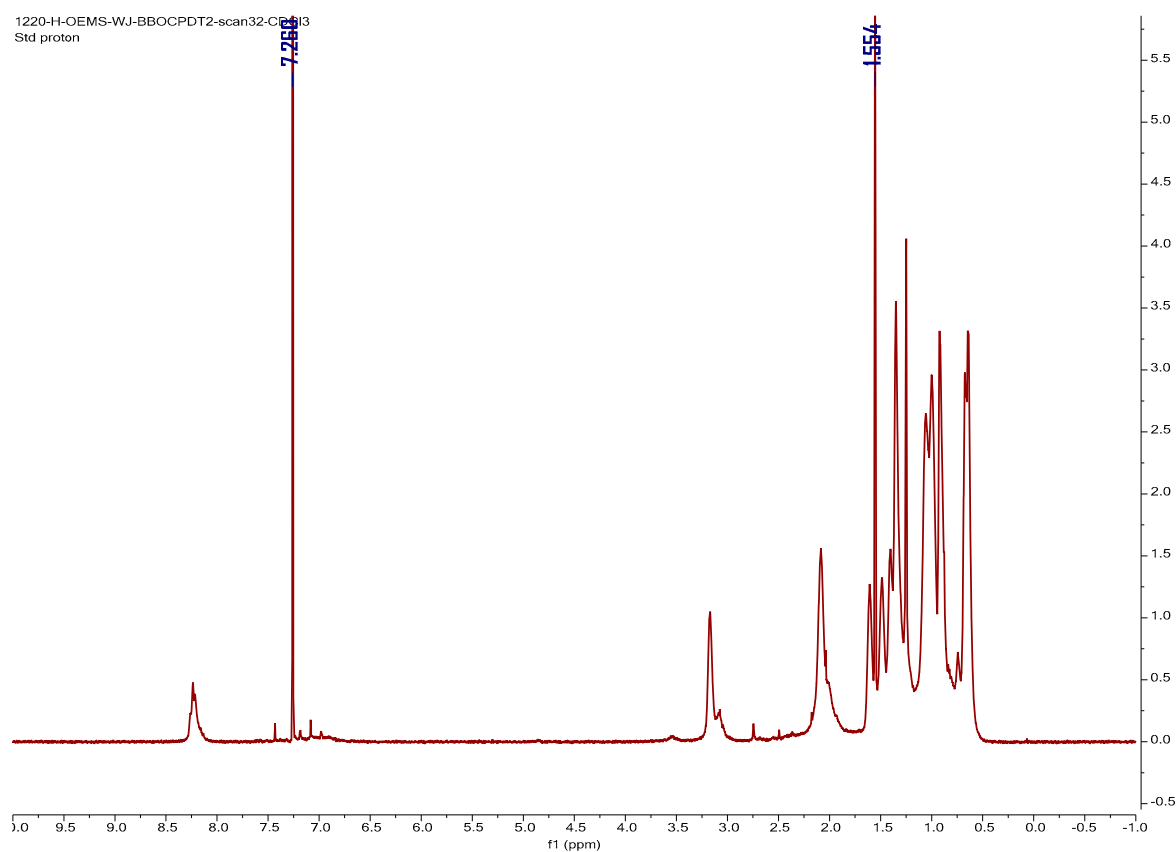

Figure S6.  $^1\text{H}$  NMR of PBC1.

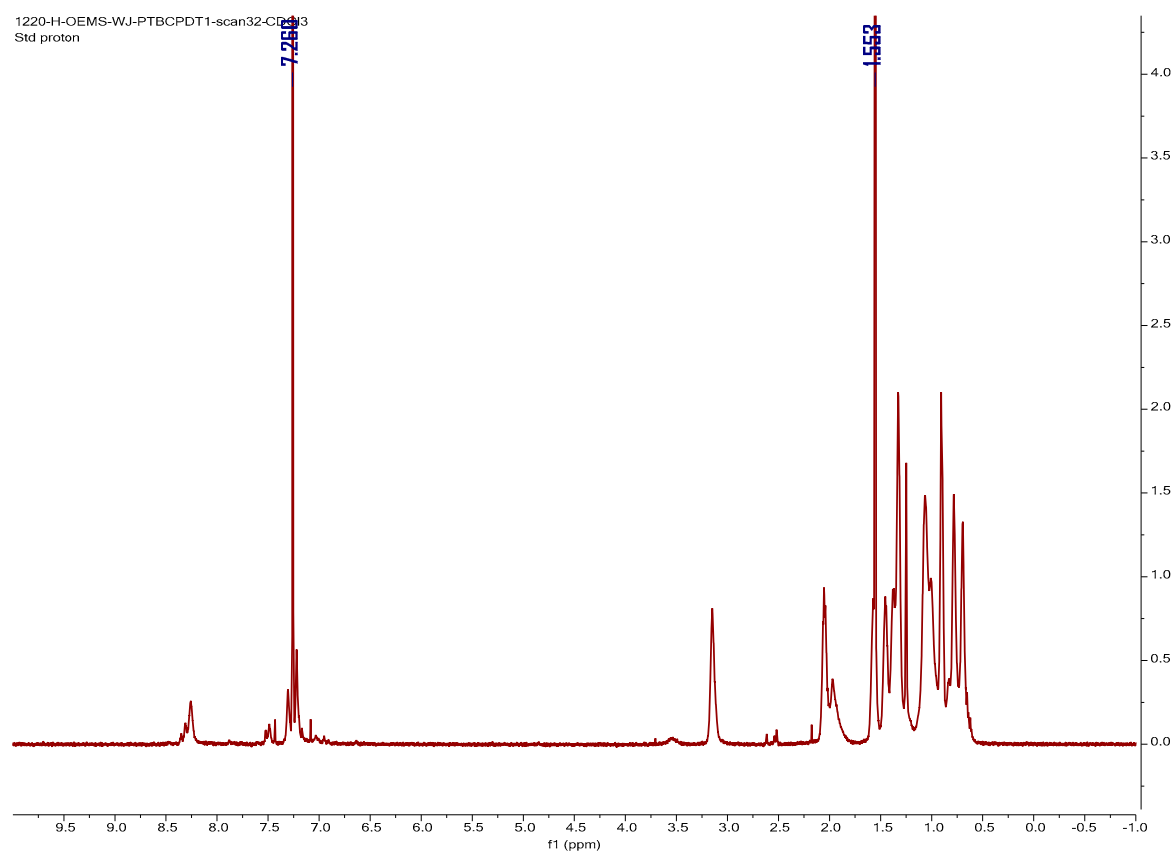

Figure S7.  $^1\text{H}$  NMR of PBC2.

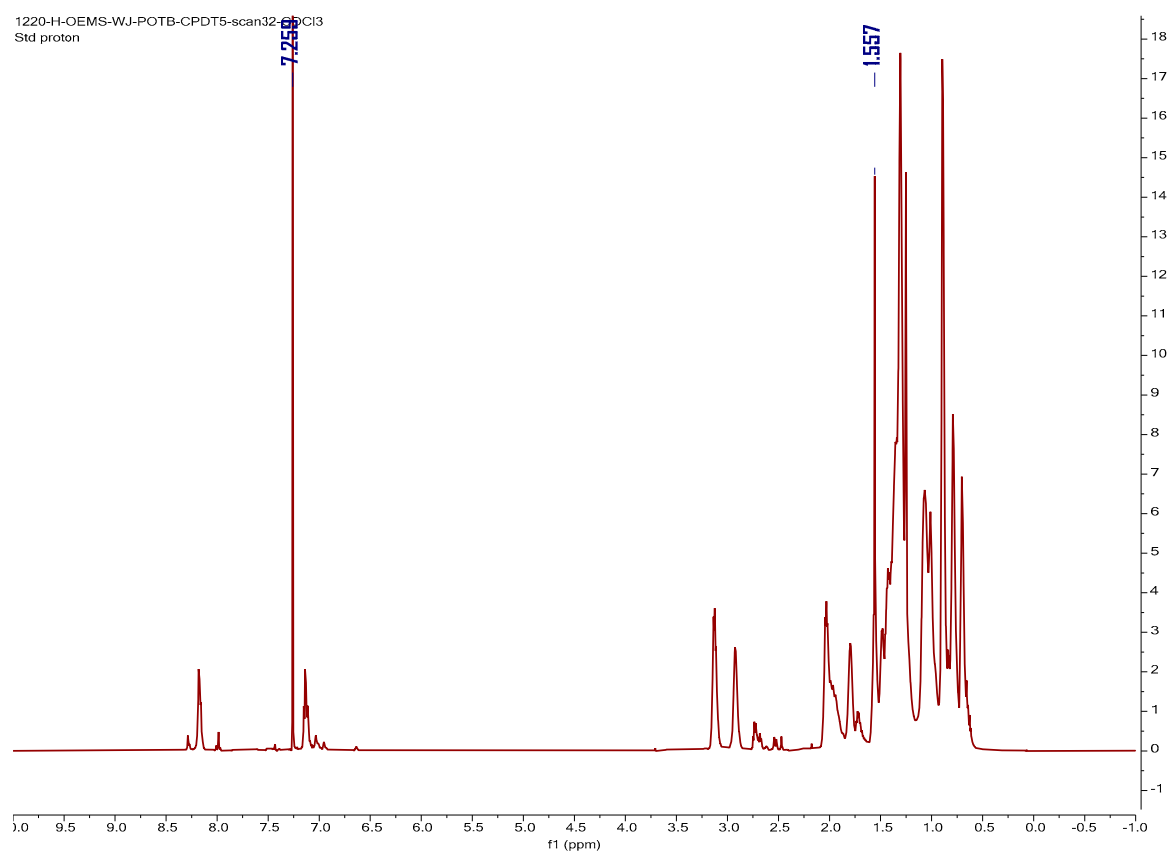

Figure S8.  $^1\text{H}$  NMR of PBC3.



### Molecular Weight Averages

| Peak # | RT (min) | Mp (g/mol) | Mn (g/mol) | Mw (g/mol) | Mz (g/mol) | Mz+1 (g/mol) | PD       |
|--------|----------|------------|------------|------------|------------|--------------|----------|
| 1      | 6.657    | 20470      | 13357      | 30427      | 58241      | 88174        | 2.277982 |

### Chromatogram

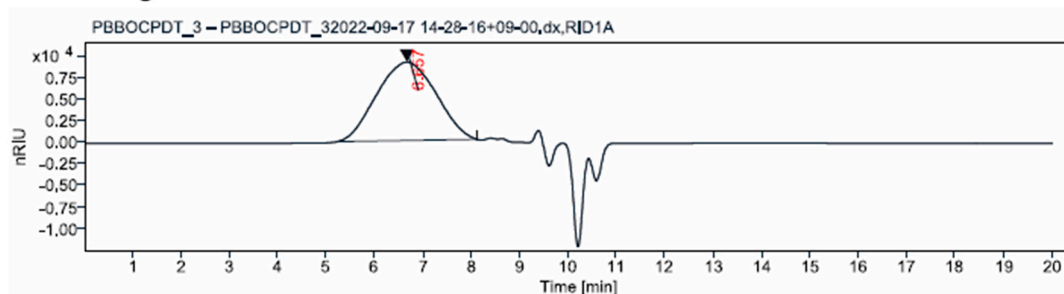

Figure S9. GPC spectrum of PBC1.

### Molecular Weight Averages

| Peak # | RT (min) | Mp (g/mol) | Mn (g/mol) | Mw (g/mol) | Mz (g/mol) | Mz+1 (g/mol) | PD       |
|--------|----------|------------|------------|------------|------------|--------------|----------|
| 1      | 6.656    | 20730      | 13511      | 30958      | 60091      | 92441        | 2.291318 |

### Chromatogram

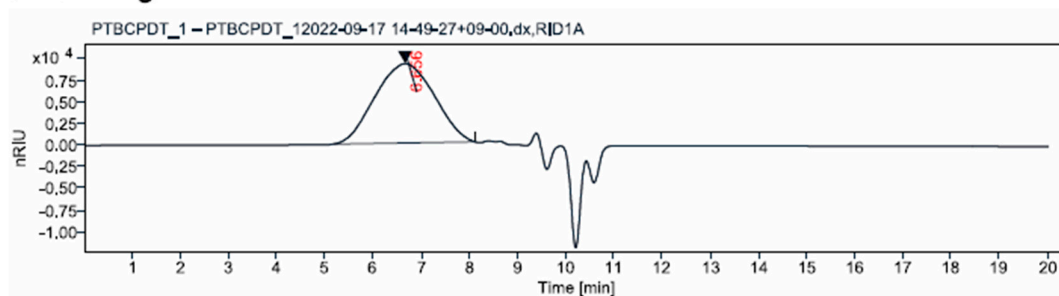

Figure S10. GPC spectrum of PBC2.

### Molecular Weight Averages

| Peak # | RT (min) | Mp (g/mol) | Mn (g/mol) | Mw (g/mol) | Mz (g/mol) | Mz+1 (g/mol) | PD       |
|--------|----------|------------|------------|------------|------------|--------------|----------|
| 1      | 7.039    | 10695      | 8352       | 12738      | 18463      | 24652        | 1.525144 |

### Chromatogram

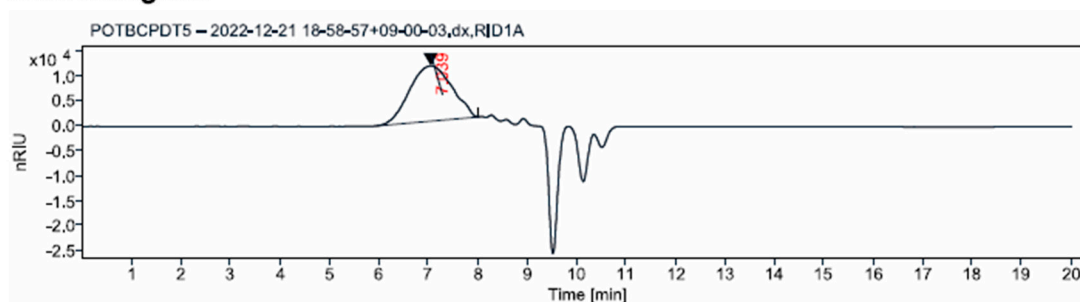

Figure S11. GPC spectrum of PBC3.

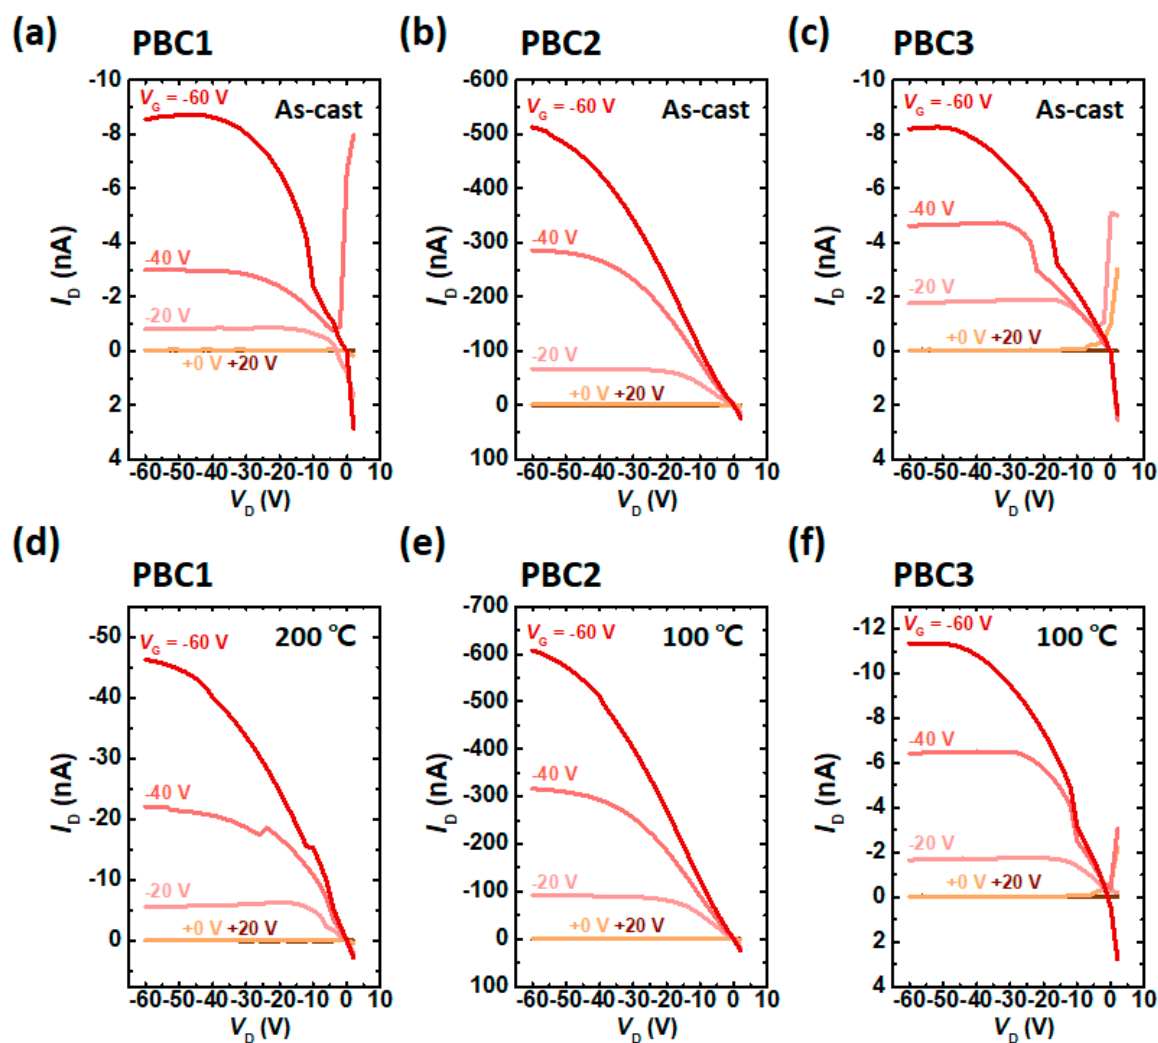

**Figure S12.** Output characteristics of (a, d) PBC1, (b, e) PBC2, and (c, f) PBC3 devices in as-casted films (a, b, c) and after thermal annealing at the optimum temperature (d: 200 °C, e: 100 °C, f: 100 °C).

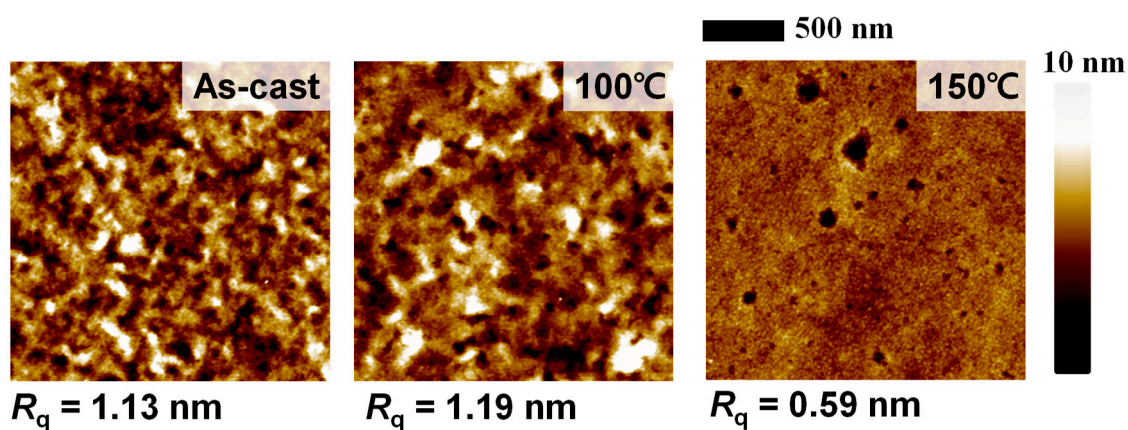

**Figure S13.** Atomic force microscopy (AFM) topography ( $2\ \mu\text{m} \times 2\ \mu\text{m}$ ) of the PBC2 thin films at the as-cast, 100°C, and 150°C annealing conditions.

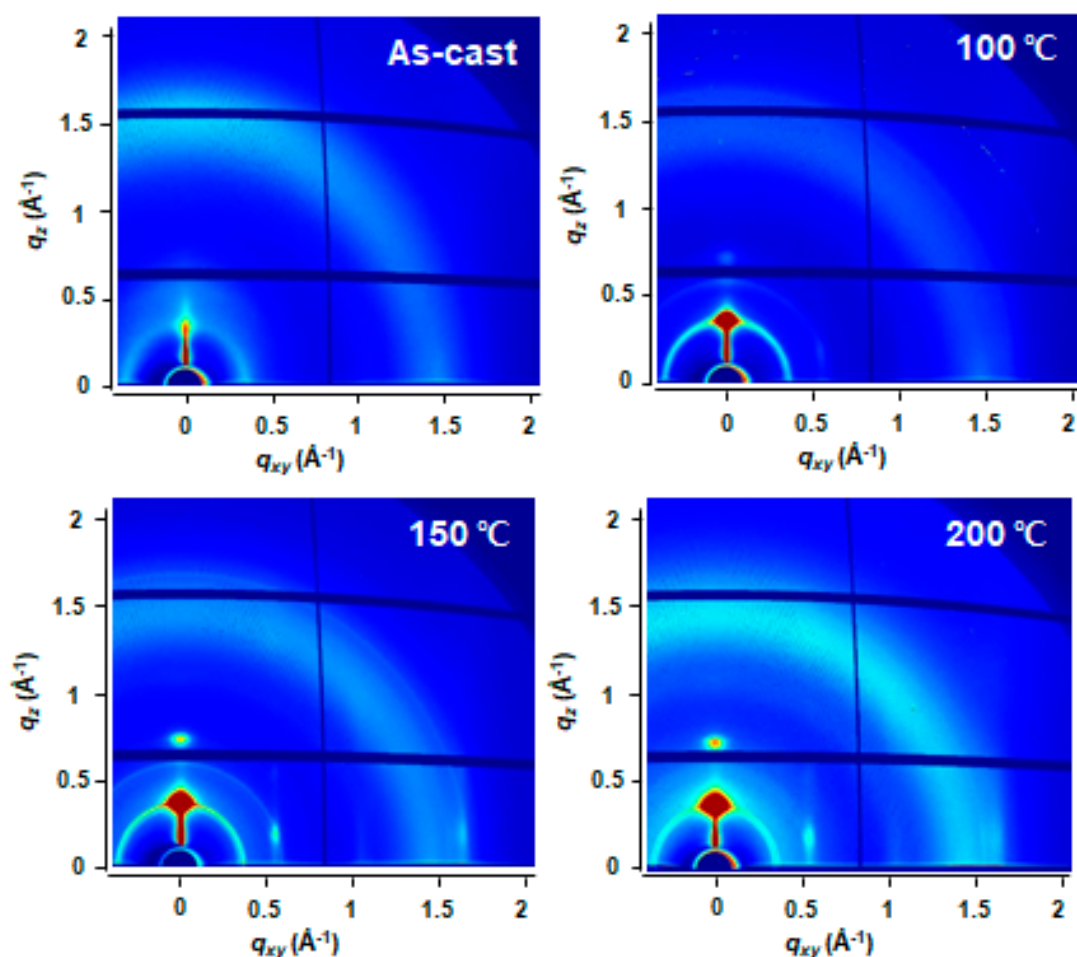

**Figure S14.** Two-dimensional grazing incidence X-ray diffraction (2D-GIXD) patterns of PBC1 depending on the thermal annealing temperature.

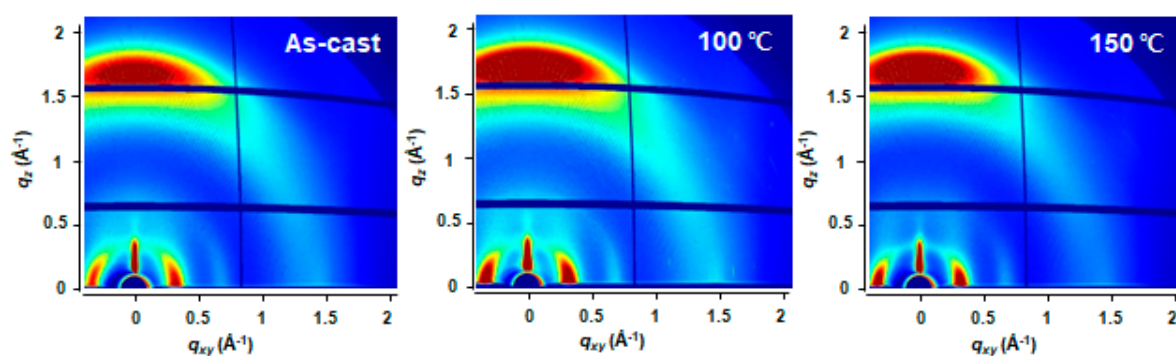

Figure S15. 2D-GIXD patterns of PBC2 depending on the thermal annealing temperature.

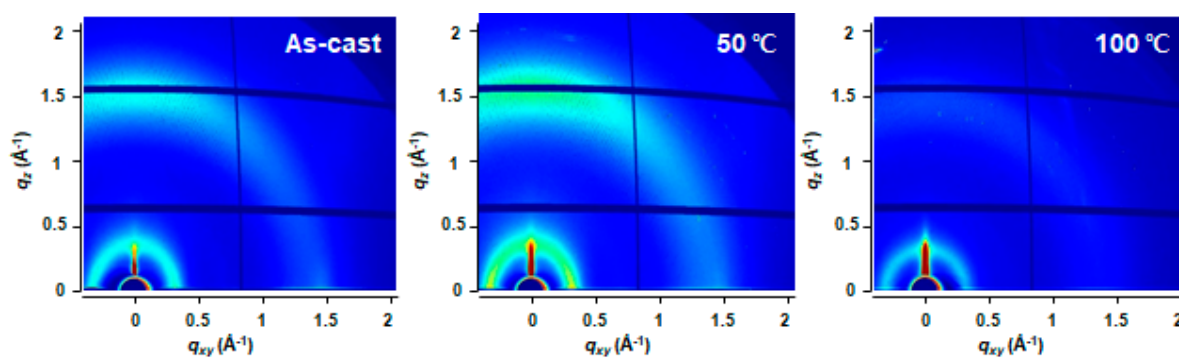

Figure S16. 2D-GIXD patterns of PBC3 depending on the thermal annealing temperature.
